# Supplementary material
Source: Research Square preprint supplement (doi:10.21203/rs.3.rs-9045113/v1)
Supplement: Supplementary file 1 [file f02234ad6980d469005f4d66.docx]

**Figures S1–S4 Table S1 (see below)**


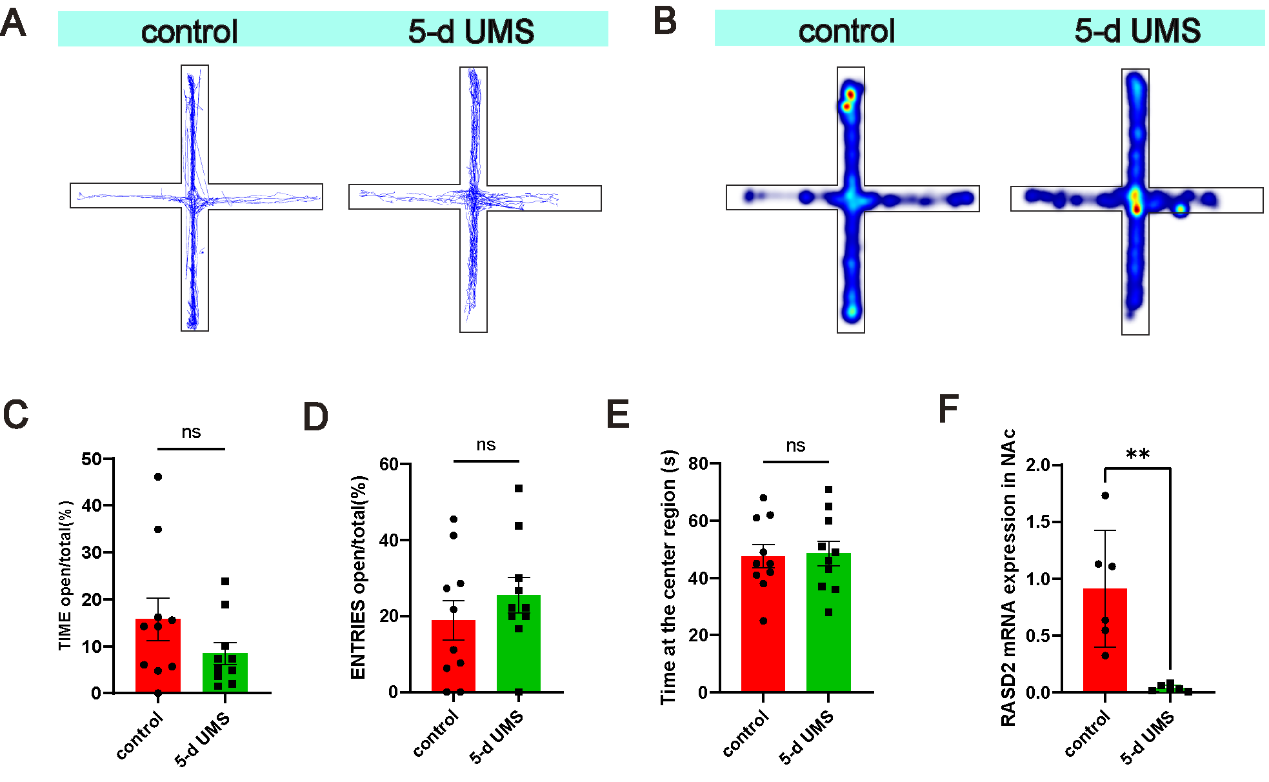


**Figure S1. Comparative analysis of control and 5-d UMS groups in the elevated plus maze test.**

**A)** Visualization of locomotor trajectories in the EPM.

**B)** Heatmap of locomotor trajectories in the EPM.

**C)** Percentage of time spent in the open arms of EPM (n=10 mice for control and 5-d UMS groups, respectively. Two-tailed unpaired t-test: t(18) = 0.1943, *p* = 0.8481).

**D)** Number of open-arm entries in EPM (n=10 mice for control and 5-d UMS groups, respectively. Two-tailed unpaired t-test: t(18) = 0.9431, *p* = 0.3581).

**E)** Time spent in the central area in EPM (n=10 mice for control and 5-d UMS groups, respectively. Two-tailed unpaired t-test: t(18) = 0.1688, *p* = 0.8678).

**F)** qRT-PCR showed changes in RASD2 mRNA levels in the nucleus accumbens of the control and 5-d UMS groups (n=6 mice for control and 5-d UMS groups, respectively. Two-tailed unpaired t-test: t(4) = 5.033, *p* = 0.0086).

Data were mean ± SEM. **p* < 0.05, ***p* < 0.01 and ****p* < 0.001. 5-d UMS 5-day unpredictable mild stress, EPM elevated plus maze test.


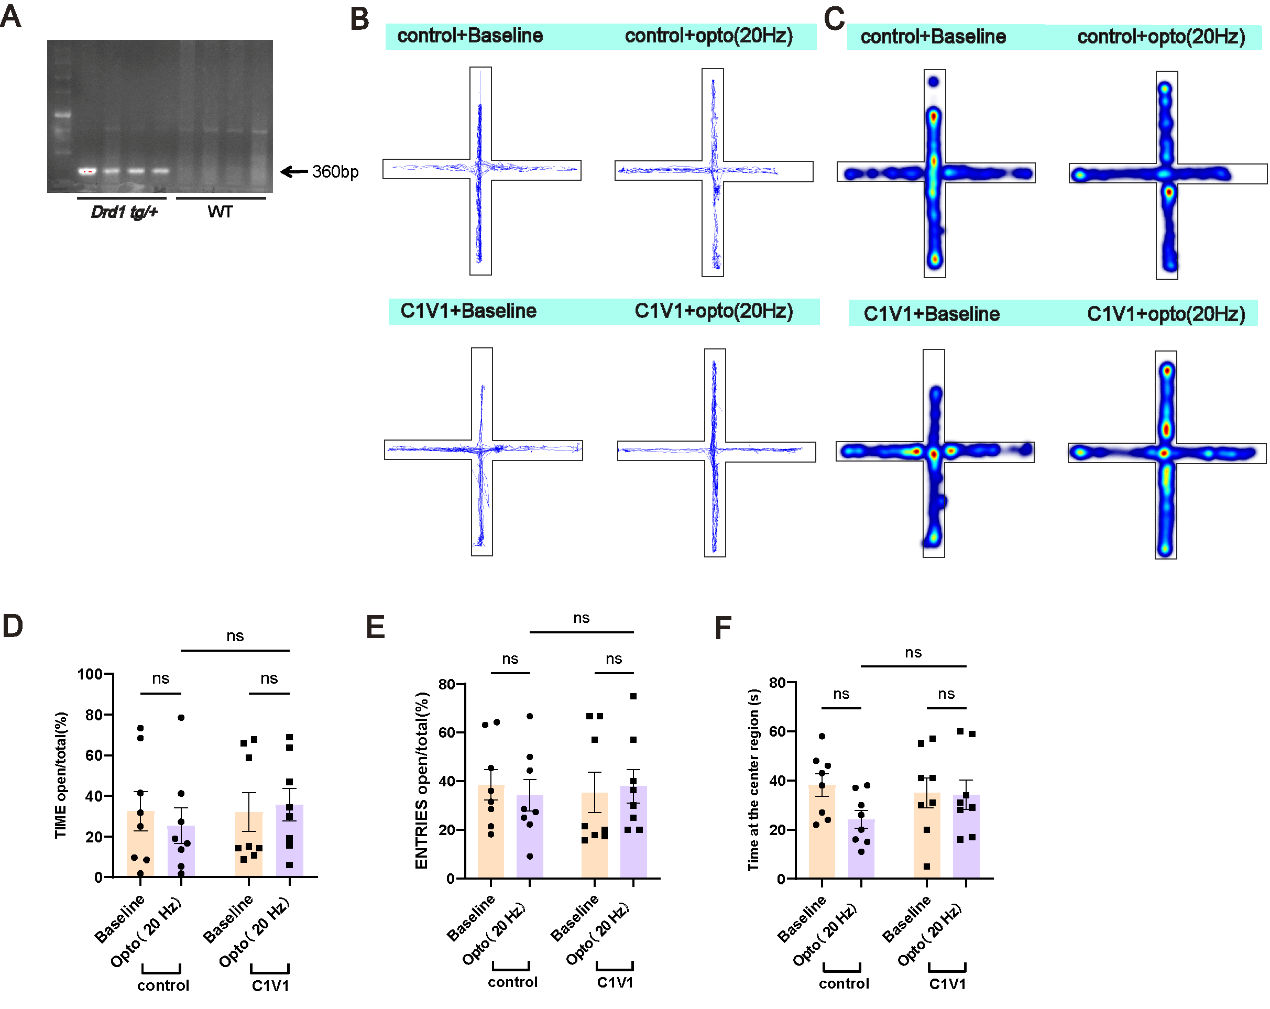


**Figure S2. The results of the elevated plus maze test were compared between the control virus group (control) and the optogenetic activation virus group (C1V1).**

**A)** Representative images for *Drd1-cre* genotype identification.

**B)** Visualization of locomotor trajectories in the EPM.

**C)** Heatmap of locomotor trajectories in the EPM.

**D)** Percentage of time spent in the open arms of EPM (n=8 mice for each group. Two-way ANOVA with factors virus (mCherry vs C1V1) and condition (baseline vs optogenetic stimulation): *F*condition×virus (1, 28) = 0.3553, *p* = 0.5559; *F*virus (1, 28) = 0.03744, *p* = 0.8480; *F*condition (1, 28) = 0.2885, *p* = 0.5954).

**E)** Number of open-arm entries in EPM (n=8 mice for each group. Two-way ANOVA with factors virus (mCherry vs C1V1) and condition (baseline vs optogenetic stimulation): *F*condition×virus (1, 28) = 0.2484, *p* = 0.6221; *F*virus (1, 28) = 0.01750, *p* = 0.8957; *F*condition (1, 28) = 0.001629, *p* = 0.9681).

**F)** Time spent in the central area in EPM (n=8 mice for each group. Two-way ANOVA with factors virus (mCherry vs C1V1) and condition (baseline vs optogenetic stimulation): *F*condition×virus (1, 28) = 1.669, *p* = 0.2069; *F*virus (1, 28) = 2.065, *p* = 0.1618; *F*condition (1, 28) = 0.4410, *p* = 0.5121).

Data were mean ± SEM. **p* < 0.05, ***p* < 0.01 and ****p* < 0.001. EPM elevated plus maze test.


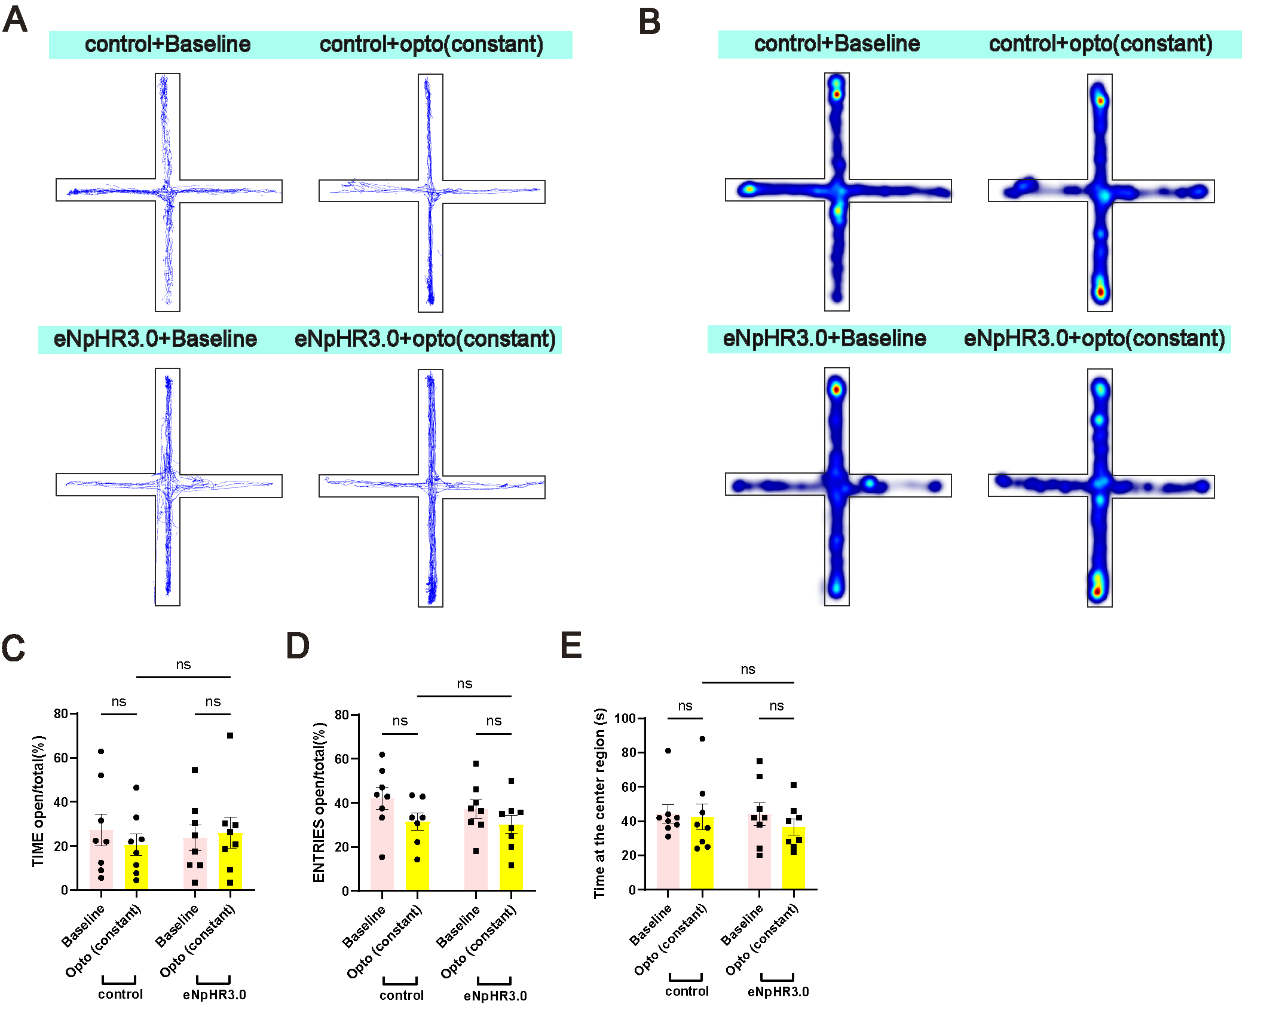


**Figure S3. The results of the elevated plus maze test were compared between the control virus group (control) and the optogenetic activation virus group (eNpHR3.0).**

**A)** Visualization of locomotor trajectories in the EPM.

**B)** Heatmap of locomotor trajectories in the EPM.

**C)** Percentage of time spent in the open arms of EPM (n=8 mice for each group. Two-way ANOVA with factors virus (mCherry vs eNpHR3.0) and condition (baseline vs optogenetic stimulation): *F*condition×virus (1, 28) = 0.4961, *p* = 0.4870; *F*virus (1, 28) = 0.1112, *p* = 0.7413; *F*condition (1, 28) = 0.02119, *p* = 0.8853).

**D)** Number of open-arm entries in EPM (n=7-8 mice for each group. Two-way ANOVA with factors virus (mCherry vs eNpHR3.0) and condition (baseline vs optogenetic stimulation): *F*condition×virus (1, 27) = 0.1803 *p* = 0.6745; *F*virus (1, 27) = 3.992, *p* = 0.0559; *F*condition (1, 27) = 0.4794, *p* = 0.4946).

**E)** Time spent in the central area in EPM (n=8 mice for each group. Two-way ANOVA with factors virus (mCherry vs eNpHR3.0) and condition (baseline vs optogenetic stimulation): *F*condition×virus (1, 28) = 0.2269, *p* = 0.6375; *F*virus (1, 28) = 0.5778, *p* = 0.4535; *F*condition (1, 28) = 0.2269, *p* = 0.6375).

Data were mean ± SEM. **p* < 0.05, ***p* < 0.01 and ****p* < 0.001. EPM elevated plus maze test.


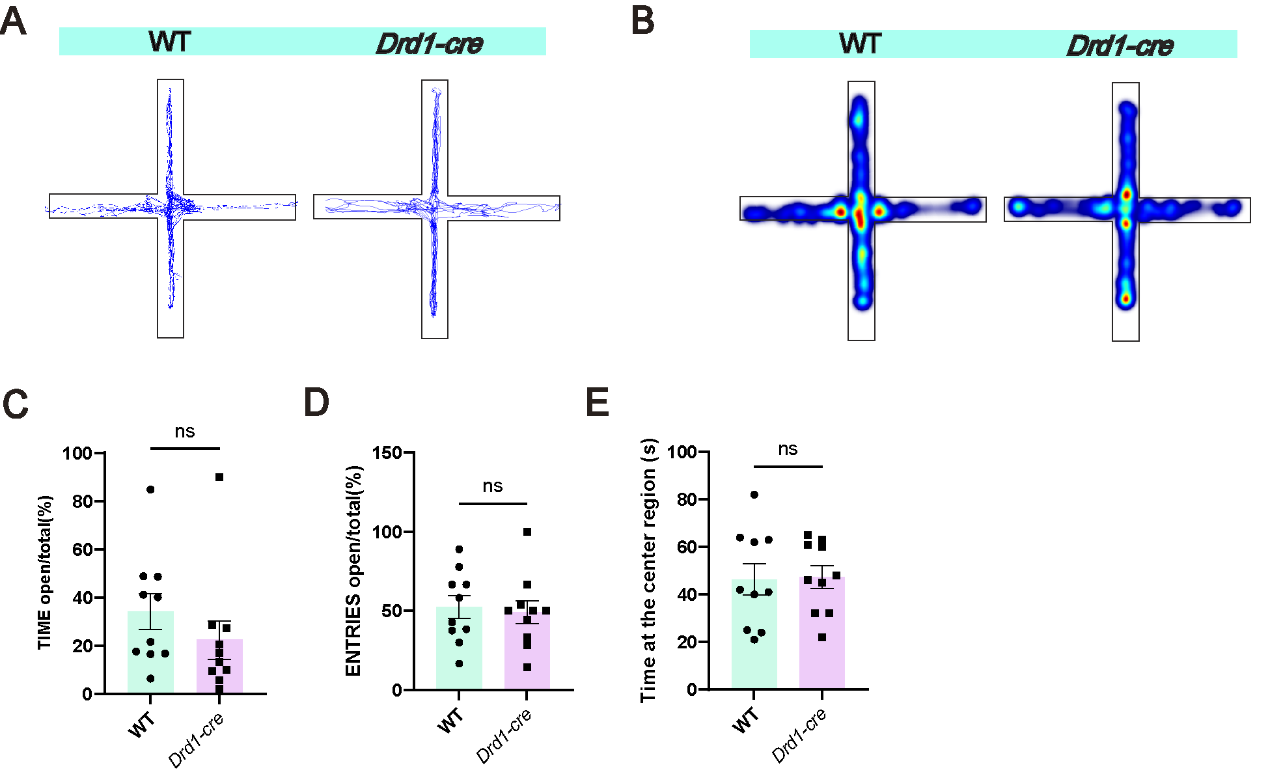


**Figure S4. Overexpression of *Rasd2* in rVTA–NAcs D1-neurons does not affect performance in the elevated plus maze in mice.**

**A)** Visualization of locomotor trajectories in the EPM.

**B)** Heatmap of locomotor trajectories in the EPM.

**C)** Percentage of time spent in the open arms of EPM (n=10 mice for WT and *Drd1-cre* groups, respectively. Two-tailed unpaired t-test: t(18) = 1.088, *p* = 0.2911).

**D)** Number of open-arm entries in EPM (n=10 mice for WT and *Drd1-cre* groups, respectively. Two-tailed unpaired t-test: t(18) = 0.3176, *p* = 0.7545).

**E)** Time spent in the central area in EPM (n=10 mice for WT and *Drd1-cre* groups, respectively. Two-tailed unpaired t-test: t(18) = 0.1244, *p* = 0.9024).

Data were mean ± SEM. **p* < 0.05, ***p* < 0.01 and ****p* < 0.001. EPM elevated plus maze test.

| **Figure number** | **n** | **Statistic method** | ***p* value** | **t value/*F* value** |
| --- | --- | --- | --- | --- |
| 1D | n=10 mice for control and 5-d UMS groups, respectively. | Two-tailed unpaired t-test | *p* = 0.4555 | t(18) = 0.7628 |
| 1E | *p* = 0.4295 | t(18) = 0.8082 |
| 1F | *p* = 0.7744 | t(18) = 0.2909 |
| 1G | *p* = 0.7997 | t(18) =0.2575 |
| 1H | n=9-10 mice for control and 5-d UMS groups, respectively. | Two-tailed unpaired t-test | *p* = 0.0356 | t(18) = 2.272 |
| 1I | *p* = 0.0063 | t(17) = 3.117 |
| 1J | *p* = 0.0222 | t(16) = 2.531 |
| 1K | n=10 mice for control and 5-d UMS groups, respectively. | Two-tailed unpaired t-test | *p* = 0.0055 | t(18) = 3.150 |
| 1L | n=8 mice for control and 5-d UMS groups, respectively. | Two-tailed unpaired t-test | *p* = 0.0023 | t(14) = 3.722 |
| 1M | n = 5 per group | Two-tailed unpaired t-test | *p* = 0.0181 | t(8) = 2.960 |
| 1O | n = 3 and 4 mice for control and 5-d UMS groups respectively. | Two-tailed unpaired t-test | *p* = 0.0038 | t(31) = 3.130 |
| 1P | *p* = 0.0047 | t(20) = 3.178 |
| 1R | *p* = 0.0037 | t(37) = 3.097 |
| 1S | *p* = 0.0010 | t(26) = 3.719 |
| 2B | n = 4 mice for control and 5-d UMS groups respectively. | Two-tailed unpaired t-test | *p* = 0.0005 | t(26) = 3.982 |
| 2C | *p* = 0.0526 | t(20) = 2.060 |
| 2E | *p* <0.0001 | t(23) = 5.847 |
| 2F | *p* = 0.0002 | t(22) = 4.461 |
| 2G | n = 6-7 mice for control and 5-d UMS groups respectively. | Two-tailed unpaired t-test | *p*RASD2= 0.0286  *p*DRD1= 0.0100  *p*DRD2 = 0.0029  *p*DARPP-32 = 0.0002 | tRASD2(10) = 2.556  tDRD1(10) = 3.167  tDRD2(12) = 3.718  tDARPP-32(10) = 5.542 |
| 2I | n = 6 mice for control and 5-d UMS groups respectively. | Two-tailed unpaired t-test | *p*RASD2= 0.0239  *p*DRD1 = 0.5941  *pDRD2* = 0.2102  *p*DARPP-32 = 0.0060 | tRASD2(9) = 2.714  tDRD1(10) = 0.5504  tDRD2(10) = 1.339  tDARPP-32(10) =3.471 |
| 2L | n = 4 mice per group for control and 5-d UMS groups respectively. | Two-tailed unpaired t-test | *p* = 0.0008 | t(26) = 3.799 |
| 2M | *p* = 0.7679 | t(23) = 0.2986 |
| 3F | n=8 mice for each group | Two-way ANOVA with factors virus (control vs C1V1) and condition (baseline vs optogenetic stimulation) | *p*condition×virus = 0.6844  *p*virus = 0.4184  *p*condition = 0.1433 | *F*condition×virus (1, 28) = 0.1687  *F*virus (1, 28) = 0.6747  *F*condition (1, 28) = 2.2680 |
| 3G | *p*condition×virus = 0.8741  *p*virus = 0.2411  *p*condition = 0.3402 | *F*condition×virus (1, 28) = 0.02558  *F*virus (1, 28) = 1.434  *F*condition (1, 28) = 0.9413 |
| 3H | *p*condition×virus= 0.5923  *p*virus = 0.6123  *p*condition= 0.2236 | *F*condition×virus (1, 28) = 0.2935  *F*virus (1, 28) = 0.2626  *F*condition (1, 28) = 1.549 |
| 3I | *p*condition×virus= 0.3963  *p*virus = 0.6204  *p*condition = 0.8259 | *F*condition×virus (1, 28) = 0.7422  *F*virus (1, 28) = 0.2508  *F*condition (1, 28) = 0.04928 |
| 3J | n=7-8 mice for each group | Two-way ANOVA with factors virus (mCherry vs C1V1) and condition (baseline vs optogenetic stimulation) | *p*condition×virus= 0.0028  *p*virus = 0.0940  *p*condition= 0.0014 | *F*condition×virus (1, 26) = 10.87  *F*virus (1, 26) =3.022  *F*condition(1, 26) = 12.86 |
| 3K | *p*condition×virus =0.0150  *p*virus = 0.2650  *p*condition= 0.1191 | *F*condition×virus (1, 26) = 6.781  *F*virus (1, 26)=1.298  *F*condition (1, 26) = 2.598 |
| 3L | *p*condition×virus =0.0010  *p*virus = 0.0442  *p*condition = 0.0083 | *F*condition×virus (1, 26) = 13.85  *F*virus (1, 26)=4.474  *F*condition (1, 26) = 8.178 |
| 3M | n=7-8 mice for each group. | Two-way ANOVA with factors virus (mCherry vs C1V1) and condition (baseline vs optogenetic stimulation) | *p*condition×virus =0.0164  *p*virus = 0.4901  *p*condition= 0.1583 | *F*condition×virus (1, 26) = 6.578  *F*virus (1, 26) =0.4900  *F*condition (1, 26) = 2.110 |
| 3N | n=8 mice for each group. | Two-way ANOVA with factors virus (mCherry vs C1V1) and condition (baseline vs optogenetic stimulation) | *p*condition×virus= 0.0171  *p*virus = 0.0414  *p*condition= 0.0238 | *F*condition×virus (1, 28) = 6.427  *F*virus (1, 28) =4.569  *F*condition (1, 28) = 5.716 |
| 4E | n=8 mice for control and C1V1 groups, respectively | Two-tailed unpaired t-test | *p* <0.0001 | t(14) = 11.88 |
| 4H | *p* <0.0001 | t(14) =7.411 |
| 4I | n=4 mice per group for control and C1V1 groups, respectively | Two-tailed unpaired t-test | *p*<0.0001 | t(26) = 9.984 |
| 4J | *p* = 0.0024 | t(22) = 3.432 |
| 5C | n=8 mice for each group | Two-way ANOVA with factors virus (control vs eNpHR3.0) and condition (baseline vs optogenetic stimulation) | *p*condition×virus = 0.9500  *p*virus = 0.4922  *p*condition = 0.9500 | *F*condition×virus (1, 28) =0.004002  *F*virus (1, 28) = 0.4843  *F*condition (1, 28) = 0.004002 |
| 5D | *p*condition×virus = 0.8950  *p*virus = 0.3764  *p*condition = 0.6527 | *F*condition×virus (1, 28) = 0.01773  *F*virus (1, 28) =0.8078  *F*condition (1, 28) = 0.2070 |
| 5E | *p*condition×virus = 0.5983  *p*virus = 0.5474  *p*condition = 0.5413 | *F*condition×virus (1, 28) = 0.2840  *F*virus (1, 28) = 0.3710  *F*condition (1, 28) = 0.1753 |
| 5F | *p*condition×virus = 0.4094  *p*virus = 0.8702  *p*condition = 0.5413 | *F*condition×virus (1, 28) = 0.7013  *F*virus (1, 28) = 0.02718  *F*condition (1, 28) = 0.3824 |
| 5G | n=7-8 mice for each group. | Two-way ANOVA with factors virus (control vs eNpHR3.0) and condition (baseline vs optogenetic stimulation) | *p*condition×virus= 0.0009  *p*virus = 0.0019  *p*condition = 0.1091 | *F*condition×virus (1, 28) = 13.74  *F*virus (1, 28) =11.82  *F*condition (1, 28) = 2.738 |
| 5H | *p*condition×virus =0.0042  *p*virus = 0.4855  *p*condition= 0.3930 | *F*condition×virus (1, 26) = 9.845  *F*virus (1, 26)=0.5007  *F*condition (1, 26) = 0.7544 |
| 5I | *p*condition×virus =0.0851  *p*virus = 0.0384  *p*condition= 0.0905 | *F*condition×virus (1, 28) = 3.186  *F*virus (1, 28)=4.723  *F*condition (1, 28) = 3.074 |
| 5J | n=8 mice for each group | Two-way ANOVA with factors virus (control vs eNpHR3.0) and condition (baseline vs optogenetic stimulation) | *p*condition×virus= 0.0035  *p*virus = 0.0122  *p*condition = 0.0122 | *F*condition×virus (1, 28) = 10.20  *F*virus (1, 28) =7.190  *F*condition (1, 28) =7.190 |
| 5K | n=8 mice for each group | Two-way ANOVA with factors virus (mCherry vs eNpHR3.0) and condition (baseline vs optogenetic stimulation) | *p*condition×virus= 0.0901  *p*virus = 0.0015  *p*condition= 0.0036 | *F*condition×virus (1, 28) =3.082  *F*virus (1, 28) =12.38  *F*condition (1, 28) = 10.08 |
| 5N | n=8 mice for control and eNpHR3.0 groups, respectively. | Two-tailed unpaired t-test | *p* <0.0001 | t(14) = 8.770 |
| 5Q | *p* <0.0001 | t(14) = 10.63 |
| 5R | n=4 mice per group | Two-tailed unpaired t-test | *p*<0.0001 | t(22) =5.773 |
| 5S | *p* = 0.0002 | t(22) = 4.474 |
| 6C | n=4 mice for WT and *Drd1-cre* groups, respectively | Two-tailed unpaired t-test | *p*<0.0001 | t(32) =6.529 |
| 6D | n=6 mice for WT and *Drd1-cre* groups, respectively | Two-tailed unpaired t-test | *p*RASD2 = 0.0083  *p*DRD1 = 0.4565  *p*DRD2 = 0.6613  *p*DARPP-32 = 0.0441  *p*cAMP = 0.0006  *p*pPKA/PKA = 0.0103 | tRASD2(10) = 3.281  tDRD1(10) = 0.7746  tDRD2(10) = 0.4515  tDARPP-32(10) = 2.302  tcAMP(10) = 4.908  tpPKA/PKA(10) = 3.152 |
| 6E | n=5-6 mice for WT and *Drd1-cre* groups, respectively | Two-tailed unpaired t-test | *p*RASD2 = 0.0024  *p*DRD1 = 0.0293  *p*DRD2 = 0.0339  *p*DARPP-32 = 0.0256  *p*cAMP = 0.0004  *p*pPKA/PKA = 0.0033 | tRASD2(9) = 4.174  tDRD1(9) = 2.589  tDRD2(10) = 2.456  tDARPP-32(9) = 2.671  tcAMP(10) = 5.172  tpPKA/PKA(10) = 3.841 |
| 6H | n=9-10 mice for WT and *Drd1-cre* groups, respectively | Two-tailed unpaired t-test | *p* = 0.4473 | t(17) = 0.7779 |
| 6I | *p* = 0.1713 | t(18) = 1.425 |
| 6J | *p* = 0.1265 | t(18) = 1.602 |
| 6K | *p* =0.9008 | t(18) =0.1265 |
| 6L | n=10 mice for WT and *Drd1-cre* groups, respectively | Two-tailed unpaired t-test | *p* = 0.0005 | t(18) = 4.261 |
| 6M | *p* = 0.0435 | t(18) = 2.171 |
| 6N | *p* = 0.0116 | t(18) = 2.810 |
| 6O | n=10 mice for WT and *Drd1-cre* groups, respectively | Two-tailed unpaired t-test | *p* = 0.0002 | t(18) = 4.750 |
| 6P | n=10 mice for WT and *Drd1-cre* groups, respectively | Two-tailed unpaired t-test | *p* = 0.0006 | t(18) = 4.141 |

**Table S1.** Statistical analysis results. Related to Figures 1-6.
